# Supplementary material
Source: ML conference proceedings conference paper supplement (https://openreview.net/forum?id=6dymbuga7nL)
Supplement: supplementary_material [file attachment]

## 326 A Appendix

### 327 A.1 Non-normalized data corresponding to Figure 1

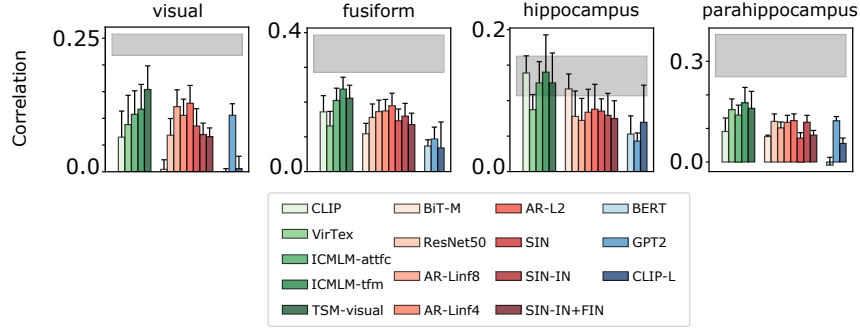

Figure 3: **Non-normalized RSA values between model and brain RDMs.** The brain RDMs are calculated based on selecting 30 voxels from each ROI, as in the main analysis. The gray bands show the upper and lower bounds of the noise-ceilings calculated by adding and subtracting it's s.e.m. respectively.

### 328 A.2 Voxel-selection based on a fixed beta-value threshold.

329 In the main analysis, we selected 30 voxels in each ROI based on the noise-ceiling analysis in the  
330 hippocampus. In other words, in each ROI we selected the 30 voxels with the highest beta values.

331 As a control method, instead of restricting the number of voxels to 30, we used the value of the 30th  
332 voxel from hippocampus as a threshold for other ROIs. The number of voxels found in each ROI  
333 for each participant is depicted in Table 1 and the RSA values in Figure 4. We observed that this  
334 alternate criterion did not affect the overall trend in other regions.

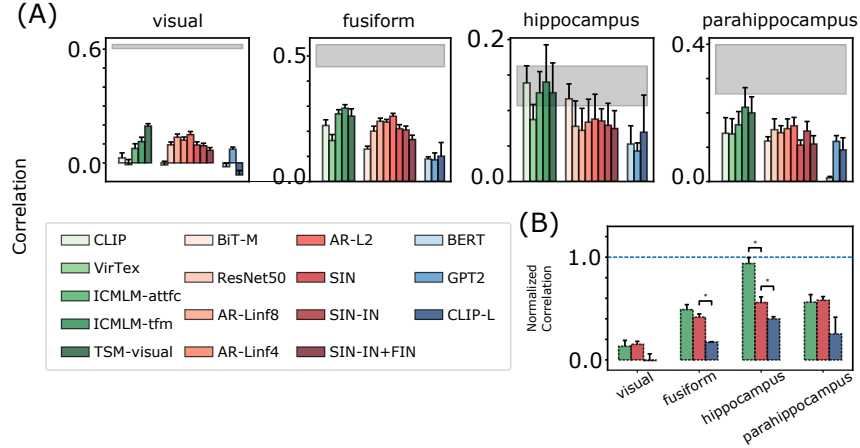

Figure 4: Non-normalized RSA values after using the beta value of the 30th voxel from hippocampus as a threshold for other ROIs for each participant.

Table 1: Number of voxels found in each region after thresholding

|                 | Subject 1 | Subject 2 | Subject 3 | Subject 4 | Subject 5 |
|-----------------|-----------|-----------|-----------|-----------|-----------|
| visual          | 530       | 831       | 343       | 707       | 592       |
| fusiform        | 532       | 376       | 217       | 368       | 508       |
| hippocampus     | 30        | 30        | 30        | 30        | 30        |
| parahippocampus | 122       | 67        | 85        | 111       | 167       |

### 335 A.3 RSA computed using different metrics

336 We verified the robustness of our results by using other metrics to compute the RDMs and RSA.

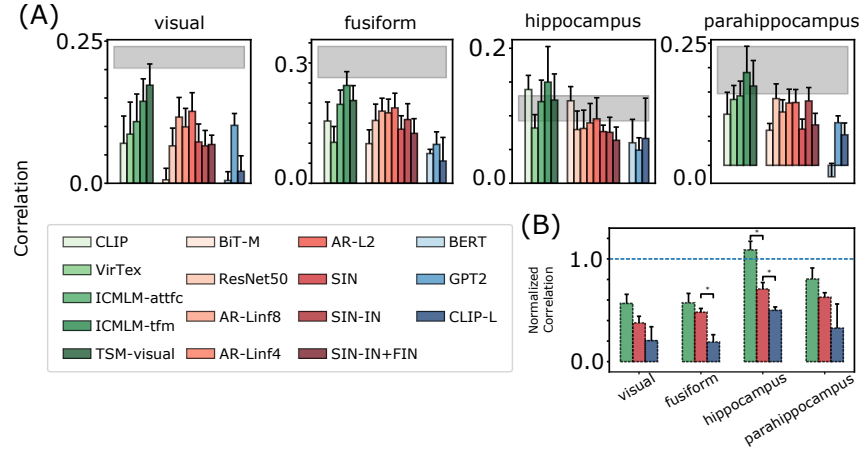

Figure 5: The RDMs were calculated using the Pearson correlation distance, and the Spearman rank correlation was used to compute the RSA.

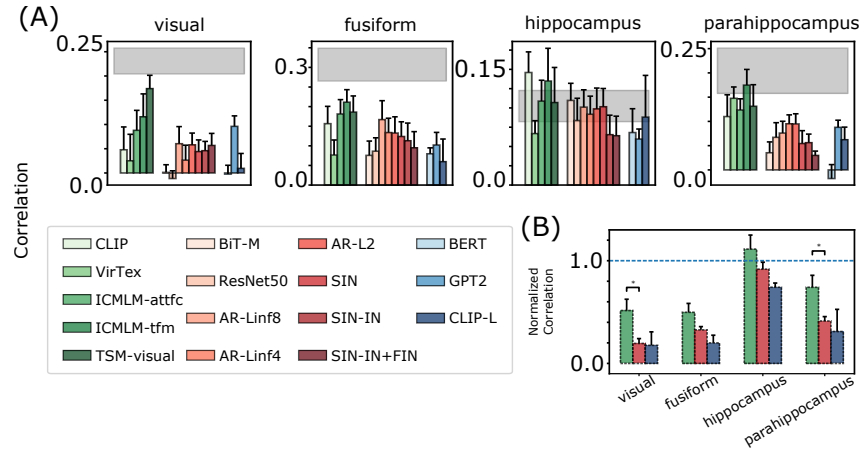

Figure 6: The RDMs were calculated using the Cosine distance, and the Spearman rank correlation was used to compute the RSA.

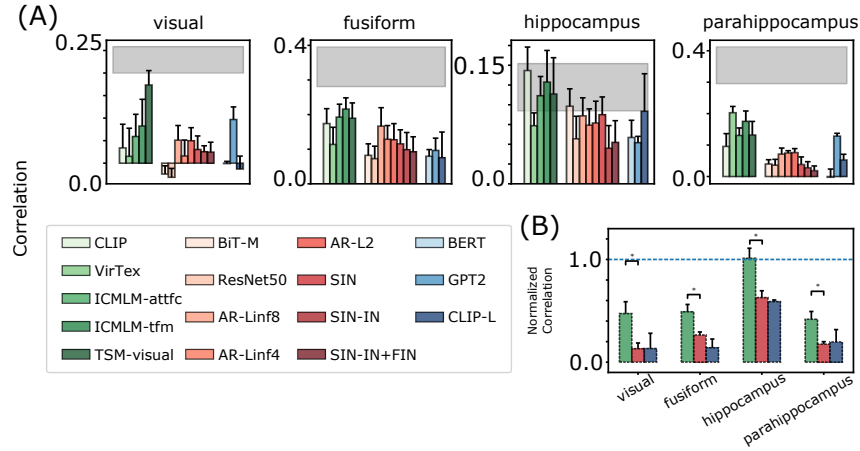

Figure 7: The RDMs were calculated using the Cosine distance, and the Pearson correlation was used to compute the RSA.

#### 337 A.4 Licenses of the assets used

| Asset      | License                                                                                                                                                         |
|------------|-----------------------------------------------------------------------------------------------------------------------------------------------------------------|
| FreeSurfer | <a href="https://surfer.nmr.mgh.harvard.edu/fswiki/FreeSurferWiki">https://surfer.nmr.mgh.harvard.edu/fswiki/FreeSurferWiki</a>                                 |
| SPM12      | GNU GPL                                                                                                                                                         |
| fMRI data  | CC0                                                                                                                                                             |
| CLIP       | MIT                                                                                                                                                             |
| VirTex     | MIT                                                                                                                                                             |
| TSM        | Apache-2.0                                                                                                                                                      |
| ICMLM      | N/A                                                                                                                                                             |
| BiT-M      | Apache-2.0                                                                                                                                                      |
| ResNet     | MIT                                                                                                                                                             |
| AR models  | MIT                                                                                                                                                             |
| SIN models | <a href="https://github.com/rgeirhos/texture-vs-shape/blob/master/DATASET_LICENSE">https://github.com/rgeirhos/texture-vs-shape/blob/master/DATASET_LICENSE</a> |
| GPT2       | MIT                                                                                                                                                             |
| BERT       | Apache-2.0                                                                                                                                                      |

Table 2: Available Licences of all the assets used in the study. Links to the appropriate webpages are provided for special licenses.

#### 338 A.5 Broader Impacts

339 The research discussed above analyses the ability of neural networks to explain the human neural  
 340 activity, specifically it demonstrates that multimodal neural networks are better than visual or linguistic  
 341 models in explaining the activity in the hippocampus.

342 Importantly, this research provides potential insights for designing better bio-plausible networks.  
 343 Upon diligent use, such networks can elucidate mechanisms in biological brains necessary to help  
 344 patients. At the same time, we are aware of the possibilities for nefarious use of such systems, and  
 345 urge all researchers to consider their implications.
